# Supplementary material for: Bergamot Polyphenols Boost Therapeutic Effects of the Diet on Non-Alcoholic Steatohepatitis (NASH) Induced by “Junk Food”: Evidence for Anti-Inflammatory Activity
Source: PubMed Central journal article supplement (PMC6267059; doi:10.3390/nu10111604), 2018-11-01
Supplement: nutrients-10-01604-s001.pdf [file nutrients-10-01604-s001.pdf]

1 *Supplementary material*2 **Bergamot Polyphenols Boost Therapeutic Effects of**  
3 **the Diet on Non-Alcoholic Steatohepatitis (NASH)**  
4 **Induced by “Junk Food”: Evidence for**  
5 **Anti-Inflammatory Activity**6 **Maddalena Parafati** <sup>1,2,†</sup>, **Antonella Lascalea** <sup>1,2,†</sup>, **Daniele La Russa** <sup>1,3</sup>, **Chiara Mignogna** <sup>4</sup>,  
7 **Francesca Trimboli** <sup>1</sup>, **Valeria Maria Morittu** <sup>1</sup>, **Concetta Riillo** <sup>1</sup>, **Rachele Macirella** <sup>3</sup>,  
8 **Vincenzo Mollace** <sup>1,2</sup>, **Elvira Brunelli** <sup>3</sup> and **Elzbieta Janda** <sup>1,2,\*</sup>9 <sup>1</sup> Department of Health Sciences, Magna Graecia University, Campus Germaneto, 88100 Catanzaro, Italy;  
10 mparafati@unicz.it (M.P.); anto.lascalea@gmail.com (A.L.); dlarussa@hotmail.it (D.L.R.);  
11 trimboli@unicz.it (F.T.); morittu@unicz.it (V.M.M.); criillo@unicz.it (C.R.); mollace@unicz.it (V.M.)12 <sup>2</sup> Interregional Research Center for Food Safety and Health, 88100 Catanzaro, Italy13 <sup>3</sup> Department of Biology, Ecology and Earth Sciences, University of Calabria, 87036 Rende (CS), Italy;  
14 rachele.macirella@unical.it (R.M.); elvira.brunelli@unical.it (E.B.)15 <sup>4</sup> Department of Experimental and Clinical Medicine, Magna Graecia University, Campus Germaneto, 88100  
16 Catanzaro, Italy; mignogna@unicz.it

17 \* Correspondence: janda@unicz.it

18 † Both authors contributed equally to this work.

19 **Table of contents**20 Supplementary Table 1 .....2  
21 Supplementary Fig. 1.....3  
22 Supplementary Fig. 2 .....4  
23 Supplementary Fig. 3.....5

24

25

26

27

28

29

30

31

32

33 **Supplementary Table S1.**

34 **List of the food items used to assemble Cafeteria (CAF) diet and related nutritional values.** One sweet and  
 35 one salty snack was provided at libitum and supplemented every 4-5 days. Harlan 2016 diet was also provided  
 36 at libitum to all experimental groups.

| Food item/Nutritional content (in 1 g)     | Kcal | Fats* | Saturated fats* | Proteins* | Total carbohydrates* | Sugar* | Fiber* |
|--------------------------------------------|------|-------|-----------------|-----------|----------------------|--------|--------|
| Harlan 2016                                | 3.00 | 0.04  | 0.01            | 0.16      | 0.64                 | 0.05   | 0.04   |
| Chocolate snack 1                          | 5.86 | 0.39  | 0.16            | 0.08      | 0.49                 | 0.42   | 0.03   |
| Breakfast cereals with chocolate A         | 3.86 | 0.03  | 0.02            | 0.06      | 0.82                 | 0.29   | n.d.   |
| Potato Chips 1                             | 5.22 | 0.34  | 0.05            | 0.04      | 0.51                 | 0.01   | 0.03   |
| Cracker with cheese cream flavored filling | 5.17 | 0.28  | 0.10            | 0.10      | 0.54                 | 0.05   | 0.03   |
| Snickers (Chocolate snack 2)               | 4.84 | 0.23  | 0.08            | 0.09      | 0.60                 | 0.52   | 0.00   |
| Tortilla chips                             | 5.00 | 0.23  | n.d.            | 0.07      | 0.65                 | n.d.   | n.d.   |
| Provola (Italian cheese)                   | 2.92 | 0.21  | 0.14            | 0.26      | 0.01                 | 0.01   | 0.00   |
| TUC bacon                                  | 4.90 | 0.23  | 0.17            | 0.08      | 0.62                 | 0.07   | 0.03   |
| Smoked chopped bacon 1                     | 3.13 | 0.25  | 0.07            | 0.22      | 0.00                 | 0.00   | 0.00   |
| Potato Chips-2                             | 5.67 | 0.35  | n.d.            | 0.06      | 0.57                 | n.d.   | n.d.   |
| Chocolate snack with milk cream filling    | 5.52 | 0.34  | 0.20            | 0.08      | 0.53                 | 0.53   | 0.01   |
| Mortadella (Italian cured sausage)         | 3.08 | 0.28  | n.d.            | 0.13      | 0.01                 | 0.00   | 0.00   |
| Provolone dolce (Italian cheese)           | 3.40 | 0.26  | 0.18            | 0.26      | 0.01                 | 0.00   | 0.00   |
| Grana Padano (Italian cheese)              | 3.84 | 0.28  | n.d.            | 0.33      | n.d.                 | n.d.   | n.d.   |
| Canestrelli (butter cookies)               | 5.28 | 0.27  | n.d.            | 0.07      | 0.64                 | n.d.   | n.d.   |
| Croccantelle (crackers) Bacon flavoured    | 1.54 | 0.06  | 0.01            | 0.06      | 0.03                 | 0.00   | 0.00   |
| Breakfast cereals with chocolate B         | 3.76 | 0.03  | 0.01            | 0.08      | 0.78                 | 0.25   | 0.05   |
| Danish Butter & Chocolate Chip Cookies     | 5.00 | 0.24  | n.d.            | 0.06      | 0.65                 | n.d.   | 0.02   |
| Potato Chips 3                             | 5.43 | 0.33  | 0.04            | 0.05      | 0.55                 | 0.01   | 0.03   |
| Snack with potatoes and cheese             | 5.16 | 0.26  | 0.13            | 0.07      | 0.63                 | 0.04   | 0.02   |
| Würstel 1                                  | 2.36 | 0.18  | 0.05            | 0.11      | 0.05                 | 0.01   | 0.00   |
| Provolone piccante (Italian cheese)        | 4.04 | 0.32  | 0.22            | 0.29      | 0.00                 | 0.00   | 0.00   |
| Concentrate milk with added sugar          | 3.22 | 0.08  | 0.05            | 0.07      | 0.55                 | 0.55   | 0.00   |
| Peanuts, toasted and salted                | 6.02 | 0.53  | 0.08            | 0.25      | 0.07                 | 0.04   | 0.07   |
| Milk cream, UHT treated                    | 2.11 | 0.21  | 0.14            | 0.03      | 0.04                 | 0.04   | 0.00   |
| Breakfast cereals with chocolate C         | 3.80 | 0.03  | 0.02            | 0.11      | 0.75                 | 0.28   | 0.07   |
| Potato Chips 4                             | 5.46 | 0.33  | 0.04            | 0.07      | 0.54                 | 0.00   | 0.04   |
| Muffin with hazelnut cream                 | 4.29 | 0.22  | n.d.            | 0.06      | 0.52                 | n.d.   | n.d.   |
| Muffin with chocolate cream 1              | 4.45 | 0.23  | n.d.            | 0.06      | 0.53                 | n.d.   | n.d.   |
| Würstel 2                                  | 3.48 | 0.32  | 0.13            | 0.14      | 0.01                 | 0.01   | 0.00   |
| Cracker Krit                               | 5.04 | 0.26  | n.d.            | 0.06      | 0.61                 | n.d.   | n.d.   |
| Chopped bacon                              | 3.51 | 0.31  | n.d.            | 0.18      | 0.01                 | n.d.   | n.d.   |
| Muffin with chocolate cream 2              | 3.93 | 0.18  | n.d.            | 0.05      | 0.53                 | n.d.   | n.d.   |

37 \* The contents are expressed in g per 1 g of food item

38 **Figure S1**

39  
40  
41  
42  
43  
44  
45  
46  
47  
48  
49  
50  
51  
52  
53  
54  
55  
56  
57  
58  
59  
60  
61  
62  
63  
64  
65  
66  
67  
68  
69  
70  
71  
72  
73  
74  
75  
76

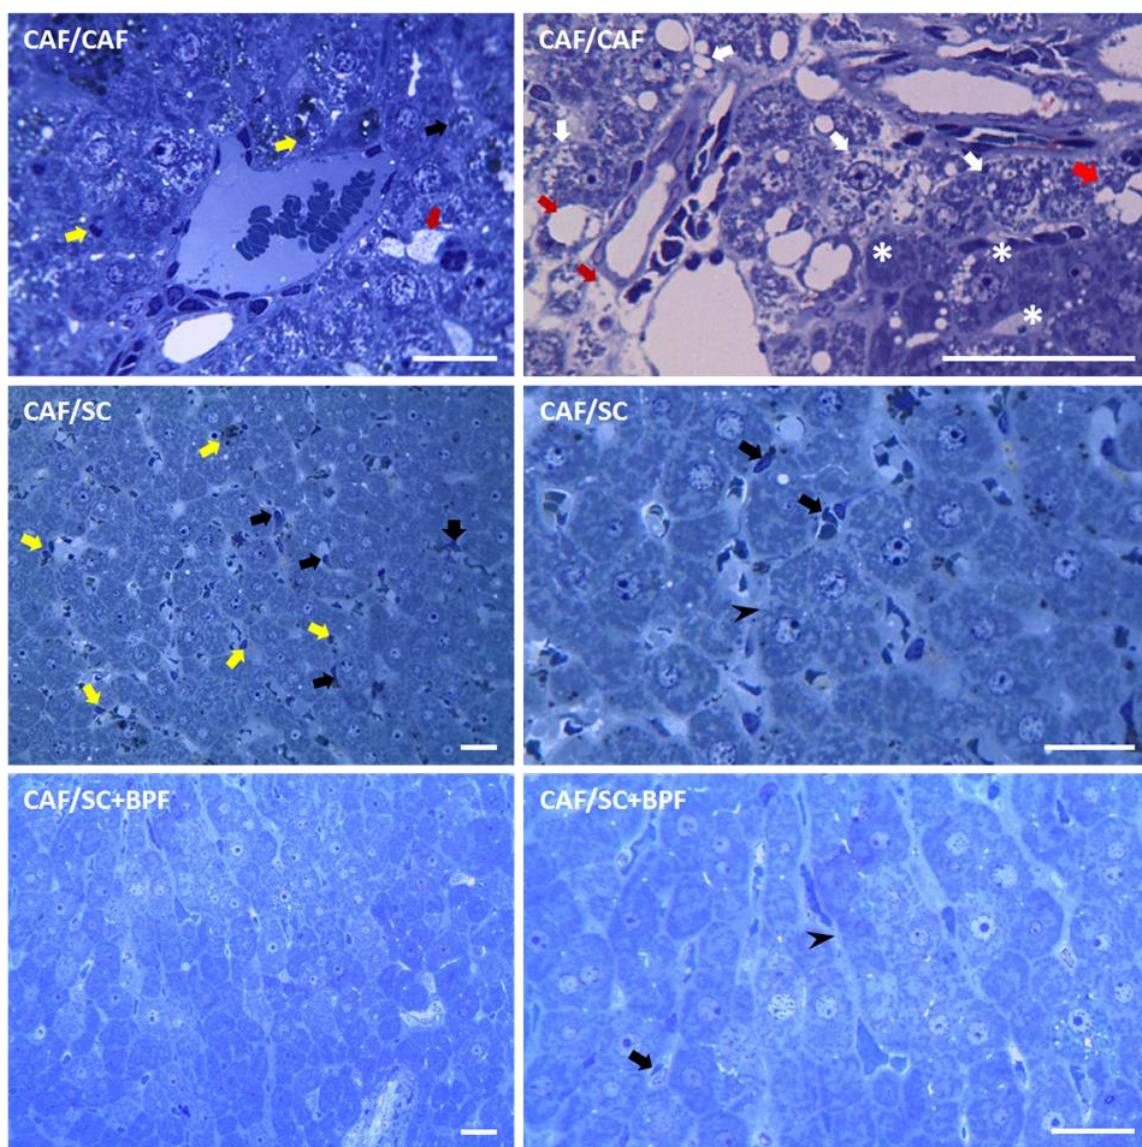

Figure S1. Toluidine-blue staining of representative liver sections from 3 different treatment groups: CAF/CAF (16 + 10 weeks), CAF/SC, and CAF/SC+BPF. Arrowhead= sinusoids; black arrow= Kupffer cells; yellow arrow= lymphocytes; white arrow= vesicular degeneration; red arrow= hepatocyte ballooning; asterisk= glycogen granules. All scale bars= 25  $\mu$ m.

77 **Figure S2**

78

79

80

81

82

83

84

85

86

87

88

89

90

91

92

93

94

95

96

97

98

99

100

101

102 **Figure S2. Evaluation of serum biochemical parameters of liver injury.** A) Alanine aminotransferase (ALT), B)  
 103 Aspartate transaminase (AST), and C) Lactate dehydrogenase (LDH) levels from 3 different treatment groups.  
 104 Data are represented as means  $\pm$  SD (5 is the minimum number of animals assigned to different experimental  
 105 groups). For statistical analysis t-test was performed. ALT, #  $p \leq 0.01$  denotes differences statistically significant CAF/CAF  
 106 vs CAF/SC and CAF/SC+BPF; AST, #  $p \leq 0.04$  CAF/CAF vs CAF/S+BPF; and LDH, #  $p \leq 0.02$  CAF/CAF vs SC/SC; ##  
 107  $p \leq 0.008$  CAF/CAF vs CAF/SC+BPF; \* $p \leq 0.03$  SC/SC vs CAF/SC+BPF.

108

109

110

111

112

113

114

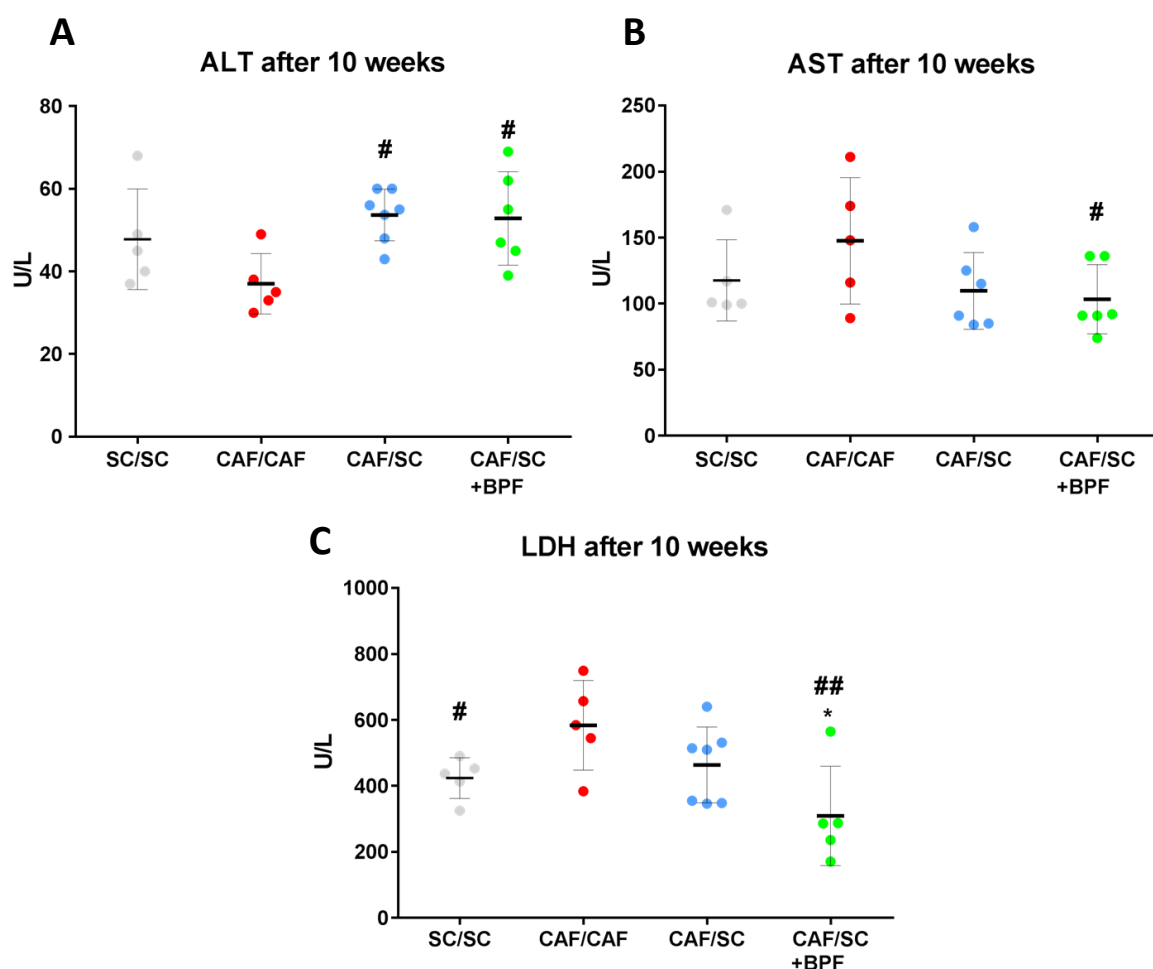

115 **Figure S3**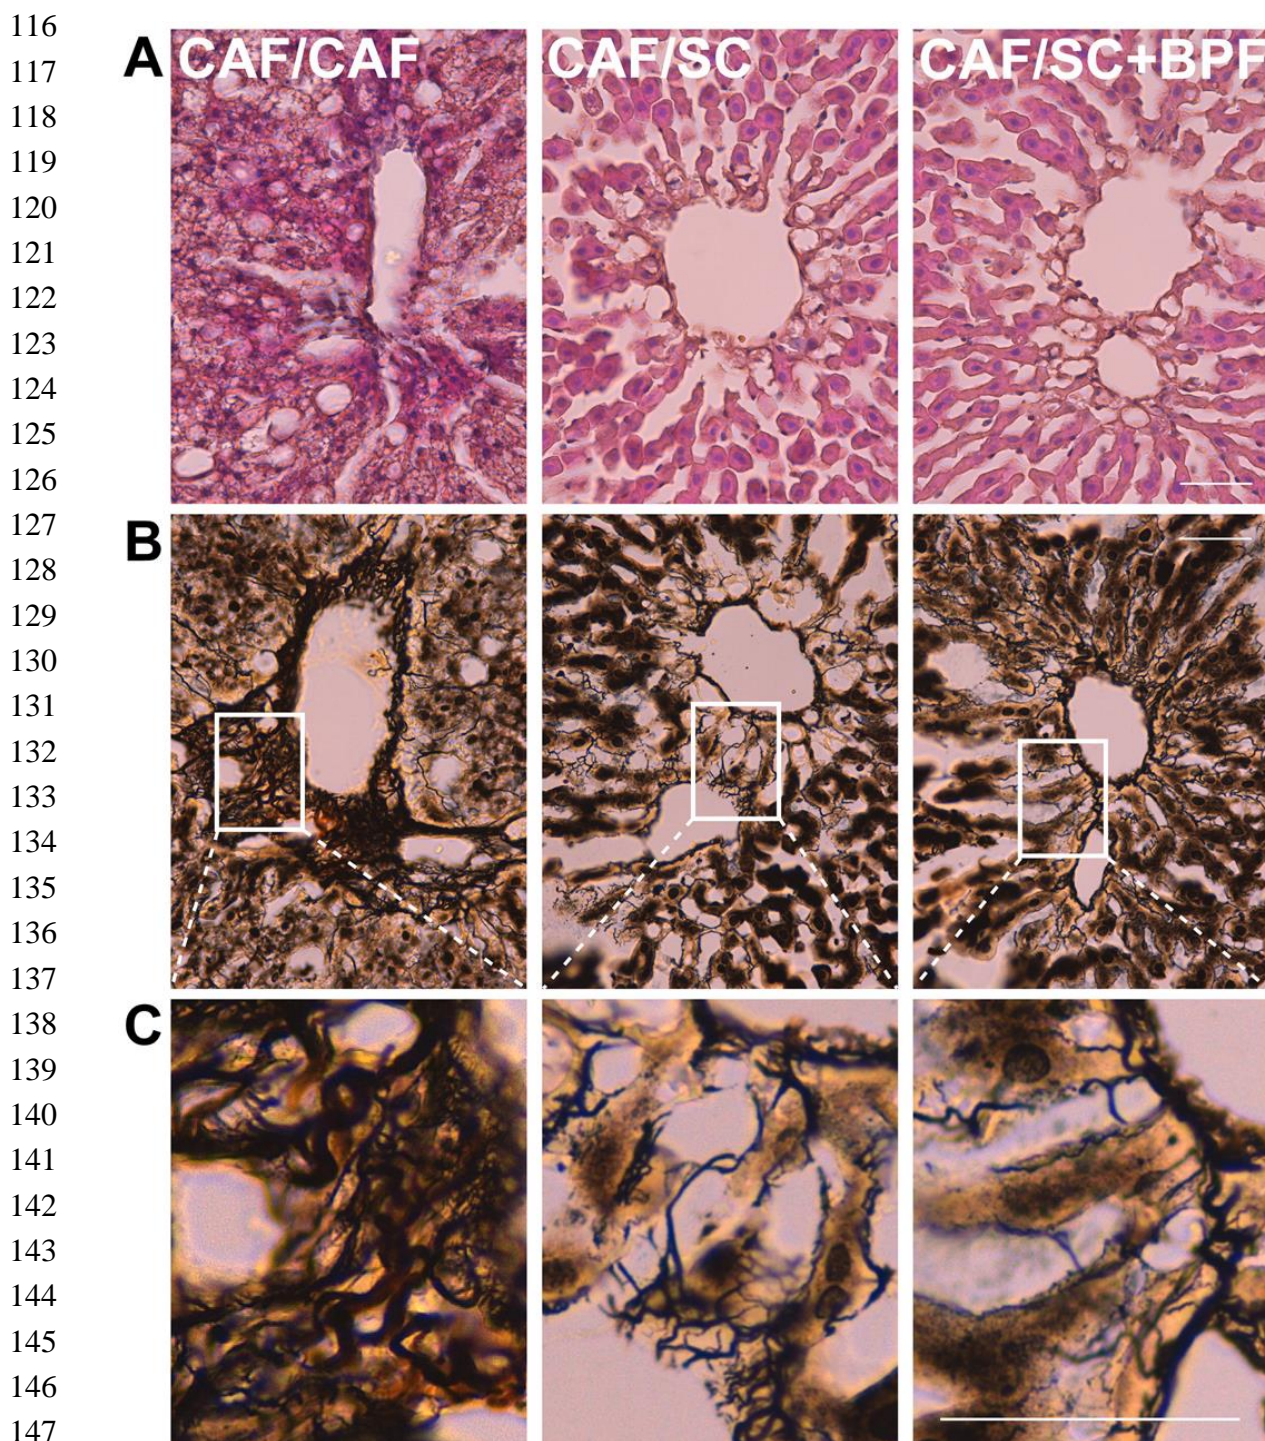

148 **Figure S3. Histological analysis of liver fibrosis in Wistar rats exposed to CAF diet for 26 weeks (CAF/CAF)**  
149 **or exposed to CAF diet for 16 weeks and then to SC or SC+BPF diet for 10 weeks. A) HE stained sections of**  
150 **the portal region of paraffin-embedded liver samples. B) Silver impregnation (SI) staining revealing reticular**  
151 **fibers. C) A magnified region of the section in B. All scale bars 50 μm. Note extensive areas of thick fibers**  
152 **around the blood vessels of the portal region in CAF/CAF liver sections and only rare and thin fibers in the**  
153 **hepatic tissue of the CAF/SC and CAF/SC+BPF sections. These sections show only few thick fibers directly**  
154 **adjacent to the lumen of the blood vessels corresponding to the endothelial layer. Braun diffuse areas inside**  
155 **hepatocytes: unspecific SI staining.**
